# Supplementary material
Source: MDPI journal article supplement (https://www.mdpi.com/2071-1050/12/4/1473)
Supplement: s1 [file s1]

|      |                          |           |                      |                                                       |                                 |                                           |                      |                                   |      |                               |                                        |                                            |
|------|--------------------------|-----------|----------------------|-------------------------------------------------------|---------------------------------|-------------------------------------------|----------------------|-----------------------------------|------|-------------------------------|----------------------------------------|--------------------------------------------|
| 2    | permits for 1000 cubic   | 0.2       | refundable guarantee |                                                       |                                 |                                           | discrimination power | 7                                 |      |                               |                                        |                                            |
| 2    |                          |           |                      | chemical<br>pest<br>control<br>per<br>hectare<br>(kg) | chemical<br>fertilizers<br>(kg) | share of<br>conventio<br>nal crops<br>(%) |                      |                                   |      |                               |                                        |                                            |
| Farm | water<br>consumptio<br>n | guarantee | total<br>permits     | 0.15                                                  | 0.25                            | 0.6                                       | saved<br>permits     | difference<br>to the best<br>(N') | rank | share of<br>guarantee<br>paid | permits<br>paid to<br>the best<br>farm | guarantee<br>saved for<br>the next<br>year |
| A    | 1250                     | € 250     | 2500                 | 1.1552                                                | 0.63536                         | 42                                        | 2448.936             | 0                                 | 1    | 0                             | € 0                                    | € 250                                      |
| B    | 300                      | € 60      | 600                  | 18.7425                                               | 12.1275                         | 50                                        | 528.3135             | 1920.622                          | 11   | 0.784268                      | € 60                                   | € 0                                        |
| C    | 400                      | € 80      | 800                  | 49.6125                                               | 33.075                          | 65                                        | 690.5788             | 1758.357                          | 8    | 0.718009                      | € 80                                   | € 0                                        |
| D    | 600                      | € 120     | 1200                 | 0.065321                                              | 0.179632                        | 60                                        | 1127.891             | 1321.045                          | 5    | 0.539436                      | € 65                                   | € 55                                       |
| E    | 300                      | € 60      | 600                  | 13.23                                                 | 15.435                          | 34                                        | 547.5135             | 1901.422                          | 10   | 0.776428                      | € 60                                   | € 0                                        |
| F    | 300                      | € 60      | 600                  | 20.9475                                               | 16.5375                         | 12                                        | 571.047              | 1877.889                          | 9    | 0.766818                      | € 60                                   | € 0                                        |
| G    | 240                      | € 48      | 480                  | 13.23                                                 | 7.7175                          | 45                                        | 418.1723             | 2030.764                          | 13   | 0.829243                      | € 48                                   | € 0                                        |
| H    | 480                      | € 96      | 960                  | 0.104871                                              | 0.070674                        | 34                                        | 919.1332             | 1529.803                          | 6    | 0.624681                      | € 60                                   | € 36                                       |
| I    | 690                      | € 138     | 1380                 | 0.2989                                                | 0.32879                         | 43                                        | 1328.146             | 1120.79                           | 4    | 0.457664                      | € 63                                   | € 75                                       |
| J    | 250                      | € 50      | 500                  | 39.69                                                 | 25.3575                         | 12                                        | 461.0143             | 1987.922                          | 12   | 0.811749                      | € 50                                   | € 0                                        |
| K    | 450                      | € 90      | 900                  | 0.034177                                              | 0.089939                        | 23                                        | 872.3448             | 1576.591                          | 7    | 0.643786                      | € 58                                   | € 32                                       |
| L    | 750                      | € 150     | 1500                 | 0.327479                                              | 0.498337                        | 34                                        | 1458.853             | 990.0832                          | 2    | 0.404291                      | € 61                                   | € 89                                       |
| M    | 750                      | € 150     | 1500                 | 0.221783                                              | 0.160601                        | 56                                        | 1432.653             | 1016.283                          | 3    | 0.414989                      | € 62                                   | € 88                                       |
|      |                          |           |                      | 12.12771                                              | 8.631795                        | 39.23077                                  |                      | winner's total income             |      |                               | € 727                                  |                                            |

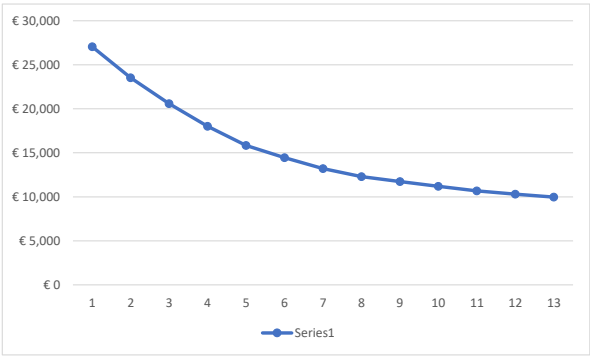

|          |          |          |          |          |          |          |          |          |          |          |          |         |
|----------|----------|----------|----------|----------|----------|----------|----------|----------|----------|----------|----------|---------|
| € 27,050 | € 23,531 | € 20,591 | € 18,012 | € 15,838 | € 14,441 | € 13,202 | € 12,295 | € 11,734 | € 11,196 | € 10,676 | € 10,297 | € 9,969 |
| 1        | 2        | 3        | 4        | 5        | 6        | 7        | 8        | 9        | 10       | 11       | 12       | 13      |
