# Supplementary material
Source: MDPI journal article supplement (https://www.mdpi.com/2071-1050/12/4/1473)
Supplement: s1 [file s1]

|      |                          |           |                      |                                                       |                                 |                                           |                         |                                   |      |                               |                                        |                                            |
|------|--------------------------|-----------|----------------------|-------------------------------------------------------|---------------------------------|-------------------------------------------|-------------------------|-----------------------------------|------|-------------------------------|----------------------------------------|--------------------------------------------|
| 2    | permits for 1000 cubic   | 0.2       | refundable guarantee |                                                       |                                 |                                           | discrimination power    | 7                                 |      |                               |                                        |                                            |
| 2    |                          |           |                      | chemical<br>pest<br>control<br>per<br>hectare<br>(kg) | chemical<br>fertilizers<br>(kg) | share of<br>conventio<br>nal crops<br>(%) |                         |                                   |      |                               |                                        |                                            |
| Farm | water<br>consumptio<br>n | guarantee | total<br>permits     | 0.15                                                  | 0.25                            |                                           | saved<br>permits<br>0.6 | difference<br>to the<br>best (N') | rank | share of<br>guarantee<br>paid | permits<br>paid to<br>the best<br>farm | guarantee<br>saved for<br>the next<br>year |
| A    | 800                      | € 160     | 1600                 | 40                                                    | 22                              | 40                                        | 1529                    | 0                                 | 1    | 0                             | € 0                                    | € 160                                      |
| B    | 300                      | € 60      | 600                  | 17                                                    | 11                              | 50                                        | 529.4                   | 999.6                             | 11   | 0.653761                      | € 60                                   | € 0                                        |
| C    | 400                      | € 80      | 800                  | 45                                                    | 30                              | 65                                        | 693.5                   | 835.5                             | 8    | 0.546436                      | € 80                                   | € 0                                        |
| D    | 600                      | € 120     | 1200                 | 12                                                    | 33                              | 60                                        | 1107.9                  | 421.1                             | 5    | 0.275409                      | € 33                                   | € 87                                       |
| E    | 300                      | € 60      | 600                  | 12                                                    | 14                              | 34                                        | 548.6                   | 980.4                             | 10   | 0.641203                      | € 60                                   | € 0                                        |
| F    | 300                      | € 60      | 600                  | 19                                                    | 15                              | 12                                        | 572.4                   | 956.6                             | 9    | 0.625638                      | € 60                                   | € 0                                        |
| G    | 240                      | € 48      | 480                  | 12                                                    | 7                               | 45                                        | 418.9                   | 1110.1                            | 13   | 0.72603                       | € 48                                   | € 0                                        |
| H    | 480                      | € 96      | 960                  | 46                                                    | 31                              | 34                                        | 889.9                   | 639.1                             | 6    | 0.417986                      | € 40                                   | € 56                                       |
| I    | 690                      | € 138     | 1380                 | 30                                                    | 33                              | 43                                        | 1302.9                  | 226.1                             | 3    | 0.147874                      | € 20                                   | € 118                                      |
| J    | 250                      | € 50      | 500                  | 36                                                    | 23                              | 12                                        | 463.3                   | 1065.7                            | 12   | 0.696991                      | € 50                                   | € 0                                        |
| K    | 450                      | € 90      | 900                  | 19                                                    | 50                              | 23                                        | 841.7                   | 687.3                             | 7    | 0.449509                      | € 40                                   | € 50                                       |
| L    | 750                      | € 150     | 1500                 | 23                                                    | 35                              | 34                                        | 1434.8                  | 94.2                              | 2    | 0.061609                      | € 9                                    | € 141                                      |
| M    | 650                      | € 130     | 1300                 | 29                                                    | 21                              | 56                                        | 1213.6                  | 315.4                             | 4    | 0.206279                      | € 27                                   | € 103                                      |
|      |                          |           |                      | 26.15385                                              | 25                              | 39.07692                                  |                         | winner's total income             |      |                               | € 528                                  |                                            |

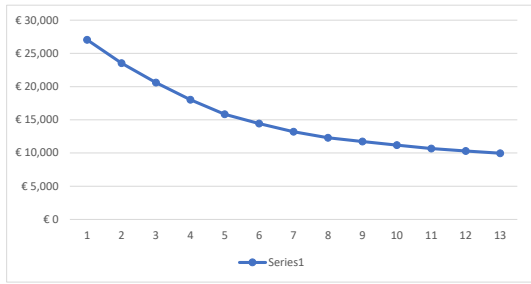

|          |          |          |          |          |          |          |          |          |          |          |          |         |
|----------|----------|----------|----------|----------|----------|----------|----------|----------|----------|----------|----------|---------|
| € 27,050 | € 23,531 | € 20,591 | € 18,012 | € 15,838 | € 14,441 | € 13,202 | € 12,295 | € 11,734 | € 11,196 | € 10,676 | € 10,297 | € 9,969 |
| 1        | 2        | 3        | 4        | 5        | 6        | 7        | 8        | 9        | 10       | 11       | 12       | 13      |
