# Supplementary material
Source: MDPI journal article supplement (https://www.mdpi.com/2071-1050/12/4/1473)
Supplement: s1 [file s1]

| Farm | water<br>consumtion | guarantee | total<br>permits | 0.15 | 0.25 | 0.6 | saved<br>pertmits | difference<br>to the best<br>(N') | rank | share of<br>guarantee<br>paid | permits<br>paid to<br>the best<br>farm | guarantee<br>saved for<br>the next<br>year |
|------|---------------------|-----------|------------------|------|------|-----|-------------------|-----------------------------------|------|-------------------------------|----------------------------------------|--------------------------------------------|
| 1    | 2                   | 3         | 4                | 5    | 6    | 7   | 8                 | 9                                 | 10   | 11                            | 12                                     | 13                                         |
| A    | 800                 | € 160     | 1600             | 40   | 22   | 40  | 1529              | 0                                 | 1    | 0                             | € 0                                    | € 160                                      |
| B    | 300                 | € 60      | 600              | 17   | 11   | 50  | 529.4             | 999.6                             | 11   | 0.653761                      | € 60                                   | € 0                                        |
| C    | 400                 | € 80      | 800              | 45   | 30   | 65  | 693.5             | 835.5                             | 8    | 0.546436                      | € 80                                   | € 0                                        |
| D    | 600                 | € 120     | 1200             | 12   | 33   | 60  | 1107.9            | 421.1                             | 5    | 0.275409                      | € 33                                   | € 87                                       |
| E    | 300                 | € 60      | 600              | 12   | 14   | 34  | 548.6             | 980.4                             | 10   | 0.641203                      | € 60                                   | € 0                                        |
| F    | 300                 | € 60      | 600              | 19   | 15   | 12  | 572.4             | 956.6                             | 9    | 0.625638                      | € 60                                   | € 0                                        |
| G    | 240                 | € 48      | 480              | 12   | 7    | 45  | 418.9             | 1110.1                            | 13   | 0.72603                       | € 48                                   | € 0                                        |
| H    | 480                 | € 96      | 960              | 46   | 31   | 34  | 889.9             | 639.1                             | 6    | 0.417986                      | € 40                                   | € 56                                       |
| I    | 690                 | € 138     | 1380             | 30   | 33   | 43  | 1302.9            | 226.1                             | 3    | 0.147874                      | € 20                                   | € 118                                      |
| J    | 250                 | € 50      | 500              | 36   | 23   | 12  | 463.3             | 1065.7                            | 12   | 0.696991                      | € 50                                   | € 0                                        |
| K    | 450                 | € 90      | 900              | 19   | 50   | 23  | 841.7             | 687.3                             | 7    | 0.449509                      | € 40                                   | € 50                                       |
| L    | 750                 | € 150     | 1500             | 23   | 35   | 34  | 1434.8            | 94.2                              | 2    | 0.061609                      | € 9                                    | € 141                                      |
| M    | 650                 | € 130     | 1300             | 29   | 21   | 56  | 1213.6            | 315.4                             | 4    | 0.206279                      | € 27                                   | € 103                                      |
|      |                     |           |                  |      |      |     |                   | winner's total income             |      |                               | € 528                                  |                                            |
