# Supplementary material
Source: MDPI journal article supplement (https://www.mdpi.com/2071-1050/12/4/1473)
Supplement: s1 [file s1]

| 2    | permits for 1000 cubic |           | 0.2           | refundable guarantee                                  |                                 |                                       | discrimination power |                             | 7    |                         |                               |                                   |
|------|------------------------|-----------|---------------|-------------------------------------------------------|---------------------------------|---------------------------------------|----------------------|-----------------------------|------|-------------------------|-------------------------------|-----------------------------------|
| 2    |                        |           |               | chemical<br>pest<br>control<br>per<br>hectare<br>(kg) | chemical<br>fertilizers<br>(kg) | share of<br>conventional crops<br>(%) |                      |                             |      |                         |                               |                                   |
| Farm | water consumption      | guarantee | total permits | 0.15                                                  | 0.25                            |                                       | saved permits        | difference to the best (N') | rank | share of guarantee paid | permits paid to the best farm | guarantee saved for the next year |
| A    | 800                    | € 160     | 2500          | 0.27436                                               | 0.150898                        | 44.1                                  | 2417.066             | 0                           | 1    | 0                       | € 0                           | € 160                             |
| B    | 500                    | € 100     | 600           | 19.67963                                              | 12.73388                        | 50                                    | 556.6375             | 1860.428                    | 10   | 0.769705                | € 100                         | € 0                               |
| C    | 700                    | € 140     | 800           | 52.09313                                              | 34.72875                        | 65                                    | 736.5758             | 1680.49                     | 8    | 0.69526                 | € 140                         | € 0                               |
| D    | 700                    | € 140     | 1200          | 0.00343                                               | 0.009431                        | 60                                    | 1138.281             | 1278.785                    | 5    | 0.529065                | € 74                          | € 66                              |
| E    | 350                    | € 70      | 600           | 13.8915                                               | 16.20675                        | 34                                    | 554.5107             | 1862.555                    | 11   | 0.770585                | € 70                          | € 0                               |
| F    | 300                    | € 60      | 600           | 21.99488                                              | 17.36438                        | 12                                    | 570.3194             | 1846.747                    | 9    | 0.764045                | € 60                          | € 0                               |
| G    | 240                    | € 48      | 480           | 13.8915                                               | 8.103375                        | 45                                    | 417.7809             | 1999.285                    | 13   | 0.827154                | € 48                          | € 0                               |
| H    | 480                    | € 96      | 960           | 0.00359                                               | 0.002419                        | 34                                    | 919.1977             | 1497.868                    | 6    | 0.619705                | € 59                          | € 37                              |
| I    | 690                    | € 138     | 1380          | 0.021252                                              | 0.023377                        | 43                                    | 1328.382             | 1088.684                    | 4    | 0.450416                | € 62                          | € 76                              |
| J    | 250                    | € 50      | 500           | 41.6745                                               | 26.62538                        | 12                                    | 459.785              | 1957.281                    | 12   | 0.809776                | € 50                          | € 0                               |
| K    | 450                    | € 90      | 900           | 0.001041                                              | 0.002739                        | 23                                    | 872.3983             | 1544.668                    | 7    | 0.639067                | € 58                          | € 32                              |
| L    | 750                    | € 150     | 1500          | 0.027799                                              | 0.042303                        | 34                                    | 1459.171             | 957.8955                    | 2    | 0.396305                | € 59                          | € 91                              |
| M    | 800                    | € 160     | 1500          | 0.018489                                              | 0.013388                        | 56                                    | 1436.989             | 980.0775                    | 3    | 0.405482                | € 65                          | € 95                              |
|      |                        |           |               | 12.5827                                               | 8.92362                         |                                       |                      | winner's total income       |      |                         | € 846                         |                                   |

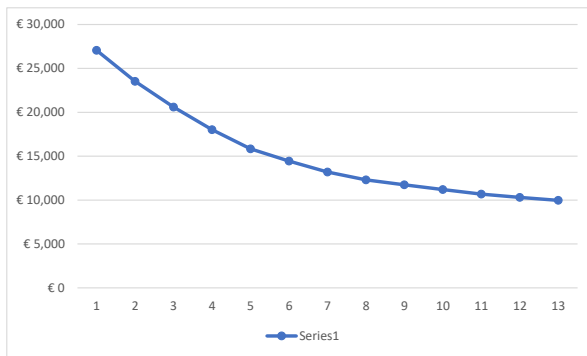

|          |          |          |          |          |          |          |          |          |          |          |          |         |
|----------|----------|----------|----------|----------|----------|----------|----------|----------|----------|----------|----------|---------|
| € 27,050 | € 23,531 | € 20,591 | € 18,012 | € 15,838 | € 14,441 | € 13,202 | € 12,295 | € 11,734 | € 11,196 | € 10,676 | € 10,297 | € 9,969 |
| 1        | 2        | 3        | 4        | 5        | 6        | 7        | 8        | 9        | 10       | 11       | 12       | 13      |
