# Supplementary material
Source: MDPI journal article supplement (https://www.mdpi.com/2071-1050/12/4/1473)
Supplement: s1 [file s1]

|      |                           |           |                  |                                                       |                                 |                                          |                      |                                   |      |                               |                                        |                                            |
|------|---------------------------|-----------|------------------|-------------------------------------------------------|---------------------------------|------------------------------------------|----------------------|-----------------------------------|------|-------------------------------|----------------------------------------|--------------------------------------------|
|      | 2 permits for 1000 cubic  |           |                  | 0.2 refundable guarantee                              |                                 |                                          | discrimination power |                                   | 7    |                               |                                        |                                            |
|      |                           |           |                  | chemical<br>pest<br>control<br>per<br>hectare<br>(kg) | chemical<br>fertilizers<br>(kg) | share of<br>conventional<br>crops<br>(%) |                      |                                   |      |                               |                                        |                                            |
| 2    |                           |           |                  |                                                       |                                 |                                          |                      |                                   |      |                               |                                        |                                            |
| Farm | grey water<br>consumption | guarantee | total<br>permits | 0.15                                                  | 0.25                            | 0.6                                      | saved<br>permits     | difference<br>to the best<br>(N') | rank | share of<br>guarantee<br>paid | permits<br>paid to<br>the best<br>farm | guarantee<br>saved for<br>the next<br>year |
| A    | 1000                      | € 200     | 2000             | 6.08                                                  | 3.344                           | 40                                       | 1948.504             | 0                                 | 1    | 0                             | € 0                                    | € 200                                      |
| B    | 300                       | € 60      | 600              | 17.85                                                 | 11.55                           | 50                                       | 528.87               | 1419.634                          | 11   | 0.728576                      | € 60                                   | € 0                                        |
| C    | 400                       | € 80      | 800              | 47.25                                                 | 31.5                            | 65                                       | 692.075              | 1256.429                          | 8    | 0.644817                      | € 80                                   | € 0                                        |
| D    | 600                       | € 120     | 1200             | 0.991241                                              | 2.725912                        | 60                                       | 1126.34              | 822.1643                          | 5    | 0.421946                      | € 51                                   | € 69                                       |
| E    | 300                       | € 60      | 600              | 12.6                                                  | 14.7                            | 34                                       | 548.07               | 1400.434                          | 10   | 0.718723                      | € 60                                   | € 0                                        |
| F    | 300                       | € 60      | 600              | 19.95                                                 | 15.75                           | 12                                       | 571.74               | 1376.764                          | 9    | 0.706575                      | € 60                                   | € 0                                        |
| G    | 240                       | € 48      | 480              | 12.6                                                  | 7.35                            | 45                                       | 418.545              | 1529.959                          | 13   | 0.785197                      | € 48                                   | € 0                                        |
| H    | 480                       | € 96      | 960              | 2.441667                                              | 1.645471                        | 34                                       | 917.6448             | 1030.859                          | 6    | 0.529052                      | € 51                                   | € 45                                       |
| I    | 690                       | € 138     | 1380             | 3.35141                                               | 3.686551                        | 43                                       | 1325.551             | 622.9527                          | 3    | 0.319708                      | € 44                                   | € 94                                       |
| J    | 250                       | € 50      | 500              | 37.8                                                  | 24.15                           | 12                                       | 462.185              | 1486.319                          | 12   | 0.7628                        | € 50                                   | € 0                                        |
| K    | 450                       | € 90      | 900              | 0.894272                                              | 2.353347                        | 23                                       | 870.955              | 1077.549                          | 7    | 0.553013                      | € 50                                   | € 40                                       |
| L    | 750                       | € 150     | 1500             | 3.075577                                              | 4.680226                        | 34                                       | 1455.937             | 492.5668                          | 2    | 0.252792                      | € 38                                   | € 112                                      |
| M    | 650                       | € 130     | 1300             | 2.842713                                              | 2.058516                        | 56                                       | 1230.918             | 717.5861                          | 4    | 0.368275                      | € 48                                   | € 82                                       |
|      |                           |           |                  | 12.90207                                              | 9.653386                        | 39.07692                                 |                      | winner's total income             |      |                               | € 639                                  |                                            |

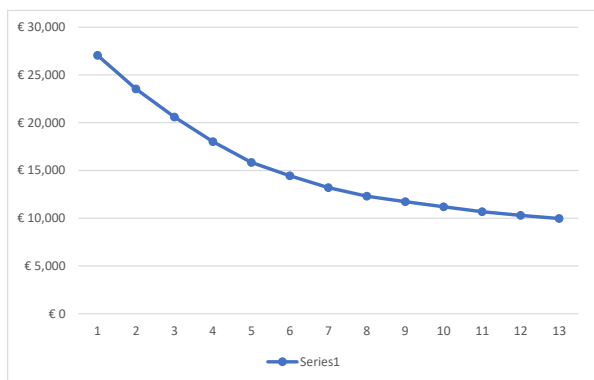

|          |          |          |          |          |          |          |          |          |          |          |          |         |
|----------|----------|----------|----------|----------|----------|----------|----------|----------|----------|----------|----------|---------|
| € 27,050 | € 23,531 | € 20,591 | € 18,012 | € 15,838 | € 14,441 | € 13,202 | € 12,295 | € 11,734 | € 11,196 | € 10,676 | € 10,297 | € 9,969 |
| 1        | 2        | 3        | 4        | 5        | 6        | 7        | 8        | 9        | 10       | 11       | 12       | 13      |
